# Supplementary material
Source: publisher figshare collection journal article supplement (https://acs.figshare.com/ndownloader/files/14020907)
Supplement: Supplementary file 1 [file 14020907]

## Sheet: QA 1
Quality Assurance
* Average standard deviation of replicate measurements of reference materials (FMIX1 and FMIX2) will be no greater than +/- 0.5‰ across FAMEs.
* Standard deviation of replicate measurements of individual FAMEs from reference materials (FMIX1 and FMIX2) will be no greater than +/- 1.0‰.
QC materials -->	A calibrated internal standard (c12:0 or c13:0) is added to each sample and reference mixture for use in both d13C and total C calculations.
	Two reference mixtures, composed of pure FAMEs of calibrated d13C (FMIX 1, FMIX 2), are co-analyzed with samples.
	One mixture is used for isotopic calibration of d13C measurements (FMIX1), while the other is not involved in corrections and serves as the primary QA standard (FMIX2).
	Additional FAMEs mixtures are analyzed to verify Rt and construct component tables
N.B. Sample materials are inherently variable in fatty acid composition and all fatty acids may not be measureable with the same quality between different sample types. Sample fatty acid composition will impact measurement error.
	Identifier 1	Data
	FMIX1		FMIX2
Component	Average of final d13C	StdDev of final d13C2	Average of final d13C	StdDev of final d13C2
c12:0	-29.01	3.89336e-07	-29.01	0
c14:0			-31.5828	0.15564
c15:0	-35.0431	0.268453
c16:0			-30.3332	0.181999
c16:1w9c/7c	-28.503	0.255935	-28.8294	0.233499
c18:0	-22.1633	0.278723	-26.7414	0.12694
c18:1w9c	-30.5634	0.306178
c18:2w6c/6t			-31.1312	0.192982
c19:0	-28.6623	0.158109
c20:0	-27.82	0.253833
c22:0	-27.3083	0.33099
c23:0			-29.4176	0.348952
cy17:0/17:1w6c			-29.7474	0.165787
Known δ 13C values					∆, ‰
FMIX 1	δ 13C		FMIX 2	δ 13C
c12:0	-29.01		c12:0	-29.01	0
c15:0	-34.91		c14:0	-31.67	0.0872
c16:1w9c/7c	-28.11		c16:0	-30.06	-0.2732
c18:0	-21.65		c16:1w9c/7c	-28.8	-0.0294
c18:1w9c	-29.47		c17:1n10c	-29.35
c19:0	-28.28		c18:0	-26.27	-0.4714
c20:0	-27.69		c18:2n6c	-29.89
c22:0	-27.04		c23:0	-29.44	0.0224

## Sheet: Methanol_Blk
DOC- d 13C measurements of MeOH
Sample ID	δ 13C
1	-43.8104
1	-43.7471
2	-43.9873
2	-44.0281
Mean	-43.8932
SD	0.135717
